# Supplementary material for: Ambient Particulate Matter as a Risk Factor for Suicide
Source: Atypon-hosted journal article supplement (doi:10.1176/appi.ajp.2010.09050706), 2010-07-16
Supplement: ajp_167_09_1100_01.pdf [file ajp_167_09_1100_01.pdf]

**Table S1. Mean Daily Concentrations of Ambient Particulate Matter and Meteorological Variables in the Republic of Korea, 2004**

|                                                                     | Mean    | SD    | Percentile |         | Interquartile Range |
|---------------------------------------------------------------------|---------|-------|------------|---------|---------------------|
|                                                                     |         |       | 10th       | 90th    |                     |
| <b>24-hour 10-<math>\mu</math>m particulate matter<sup>a</sup></b>  |         |       |            |         |                     |
| ( $\mu\text{g}/\text{m}^3$ )                                        |         |       |            |         |                     |
| Total                                                               | 50.85   | 24.32 | 26.33      | 82.58   | 27.59               |
| Seoul                                                               | 59.16   | 29.35 | 29.84      | 94.65   |                     |
| Incheon                                                             | 58.00   | 26.95 | 29.87      | 92.79   |                     |
| Busan                                                               | 59.76   | 23.94 | 33.96      | 87.26   |                     |
| Daegu                                                               | 41.66   | 17.02 | 21.74      | 64.71   |                     |
| Daejeon                                                             | 49.83   | 26.14 | 22.97      | 82.65   |                     |
| Gwangju                                                             | 44.30   | 18.58 | 25.13      | 68.43   |                     |
| Ulsan                                                               | 43.27   | 16.87 | 24.93      | 64.13   |                     |
| <b>24-hour 2.5-<math>\mu</math>m particulate matter<sup>b</sup></b> |         |       |            |         |                     |
| ( $\mu\text{g}/\text{m}^3$ )                                        |         |       |            |         |                     |
| Seoul                                                               | 29.90   | 14.19 | 14.70      | 37.46   | 18.20               |
| <i>Meteorological variables</i>                                     |         |       |            |         |                     |
| Temperature ( $^{\circ}\text{C}$ )                                  | 14.20   | 9.06  | 1.40       | 25.30   | 14.70               |
| Dew point temperature ( $^{\circ}\text{C}$ )                        | 6.49    | 10.90 | -8.49      | 20.80   | 18.14               |
| Relative humidity (%)                                               | 61.35   | 16.00 | 39.53      | 82.60   | 23.50               |
| Air pressure (hPa)                                                  | 1016.10 | 7.65  | 1006.03    | 1026.20 | 12.00               |
| Sunlight (hours)                                                    | 6.19    | 3.82  | 0.10       | 10.70   | 6.60                |

a 24-hour 10- $\mu$ m particulate matter: 24-hour mean concentration of particulate matter  $\leq 10 \mu\text{m}$  in aerodynamic diameter.

b 24-hour 2.5- $\mu$ m particulate matter: 24-hour mean concentration of particulate matter  $\leq 2.5 \mu\text{m}$  in aerodynamic diameter. Five imputed data sets were used.
